# Supplementary material for: Impact of Liver Inflammation on Bile Acid Side Chain Shortening and Amidation
Source: MDPI journal article supplement (doi:10.3390/cells11243983), 2022-12-09
Supplement: s1 [file s1]

# SUPPLEMENTARY TABLES

**Supplementary Table S1.** Primer sequences used to quantify human gene expression by RT-qPCR.

| Gene           | Protein      | Accession<br>number | Sequence (5'-3')              | Type |
|----------------|--------------|---------------------|-------------------------------|------|
| <i>ABCB11</i>  | BSEP         | NM_003742           | GTGAAGGAATGGTGACCGTGGA        | F    |
|                |              |                     | TCCTTGGCAGCTTGGAATATGTCT      | R    |
| <i>ABCD3</i>   | PMP70        | NM_002858.4         | CGGCCTGCACGGTAAGAAAAGT        | F    |
|                |              |                     | CTTGTCCACCACAGCTCGCT          | R    |
| <i>ACOX1</i>   | ACOX1        | NM_004035.7         | CCTGGTGGGCTTGGAAGACTT         | F    |
|                |              |                     | GTCACCAACGGTAATTCCTGGCA       | R    |
| <i>ACOX2</i>   | ACOX2        | NM_003500.4         | CACCCCACTGCCAGGAATCAT         | F    |
|                |              |                     | GCAAGACCTGTGCAAAGCGACT        | R    |
| <i>ACOX3</i>   | ACOX3        | NM_003501.3         | CCAAGTACCTCCTCCATAGCTTGGT     | F    |
|                |              |                     | CGTGGCTTAATTCGGTCAGAGCAAA     | R    |
| <i>AMACR</i>   | AMACR        | NM_014324.6         | GTGGTGGCCTTATGTGTGCACT        | F    |
|                |              |                     | GCTGTTCTTCCACCATATTTGCATCA    | R    |
| <i>ANGPTL4</i> | ANGPTL4      | NM_139314.3         | AGCAGGATCCAGCAACTCTTCCA       | F    |
|                |              |                     | CCAGGAGGCCAAACTGGCTTT         | R    |
| <i>BAAT</i>    | BAAT         | NM_001701           | GGGCAGGTTCTCTTGCTAGGTTTT      | F    |
|                |              |                     | CTGGCTCATCAACAAGTGCACTCA      | R    |
| <i>CYP7A1</i>  | CYP7A1       | NM_000780.2         | CCATAAGGTGTTGTGCCACGGAAA      | F    |
|                |              |                     | GCCCAAATGCCTTCGCAGAAG         | R    |
| <i>FGF19</i>   | FGF19        | NM_005117.3         | GCGCACAGTTTGCTGGAGATCA        | F    |
|                |              |                     | AGTCTTCCTCCGAGTACTGAAGCAG     | R    |
| <i>HPRT1</i>   | HPRT1        | NM_000194           | ATGGACAGGACTGAACGTCTTGCT      | F    |
|                |              |                     | TGAGCACACAGAGGGCTACAATGT      | R    |
| <i>HSD17B4</i> | DBP          | NM_001292027.1      | TGTTTCAATGAATGATTTGGGAGGGGACT | F    |
|                |              |                     | TCTTCCACTGAATCATAGTTGGCCACT   | R    |
| <i>NR0B2</i>   | SHP          | NM_021969           | GGCTTCAATGCTGTCTGGAGT         | F    |
|                |              |                     | CTGGCACATCGGGGTGAAGA          | R    |
| <i>SLC51A</i>  | OST $\alpha$ | NM_152672           | TTCCAGGTTCTCCTCATCCTGAC       | F    |
|                |              |                     | CAATTCATCACTTGAGACCTGGTTTT    | R    |
| <i>SCP2</i>    | SCPx         | NM_002979.5         | GGGTTGGCATGACCAAGTTTGTGA      | F    |
|                |              |                     | GCTAAAGCCTTCTTGCCTGCTTCTT     | R    |
| <i>SREBPF1</i> | SREBP-1c     | NM_001321096.2      | GCACTTTCGAAGACATGCTTCAGCTT    | F    |
|                |              |                     | CTCCCAGCATAGGGTGGGTCAAATA     | R    |

Forward (F) and reverse (R) primers used in qPCR.

**Supplementary Table S2.** Primary antibodies and conditions for immunoblotting.

| Antigen                                       | Origin                       | Dilution | Blocking proteins | Reference                        |
|-----------------------------------------------|------------------------------|----------|-------------------|----------------------------------|
| BAAT                                          | <i>Oryctolagus cuniculus</i> | 1:1000   | Milk 5%           | Novus Biologicals (NBP2-92503)   |
| OSM                                           | <i>Capra aegagrus hircus</i> | 1:500    | BSA 5%            | R&D systems (BAF295).            |
| pY705-STAT3                                   | <i>Mus musculus</i>          | 1:1000   | BSA 5%            | Cell Signaling Technology (9138) |
| STAT-3                                        | <i>Mus musculus</i>          | 1:2000   | BSA 5%            | Cell Signaling Technology (9139) |
| $\alpha$ -Tubulin                             | <i>Mus musculus</i>          | 1:5000   | BSA 5%            | Sigma-Aldrich (T6074)            |
| OSM, oncostatin M; BSA, bovine serum albumin. |                              |          |                   |                                  |
